# Supplementary material
Source: HighWire-hosted journal article supplement (https://jnm.snmjournals.org/highwire/filestream/94509/field_highwire_adjunct_files/0/125500_Supplemental_Data.pdf)
Supplement: 125500_Supplemental_Data.pdf [file 125500_Supplemental_Data.pdf]

**SUPPLEMENTAL TABLE 1.** Summary of Patient Characteristics, Imaging Findings, and Outcome

| Patient no. | Sex | Age (y) | Initial symptom | Disease extension | Histology              | WHO grade | MR imaging contrast enhancement | <sup>18</sup> F-DOPA PET/MR imaging | SUVmax | T/N | T/S | Indication for <sup>18</sup> F-DOPA scan | Contribution of <sup>18</sup> F-DOPA PET/MR imaging     | Treatment response or outcome at the end of follow-up | Follow-up time (mo) |
|-------------|-----|---------|-----------------|-------------------|------------------------|-----------|---------------------------------|-------------------------------------|--------|-----|-----|------------------------------------------|---------------------------------------------------------|-------------------------------------------------------|---------------------|
| 1           | M   | 14      | Unspecific      | L-T, F            | Diffuse astrocytoma    | II        | No                              | No uptake                           | 0.7    | 1   | 0.7 | Baseline evaluation/ after biopsy        | Changed treatment strategy                              | Stable disease                                        | 31                  |
| 2           | M   | 10      | Headache        | R-F, P            | Diffuse astrocytoma    | II        | No                              | No uptake                           | 0.4    | 1   | 0.6 | Baseline evaluation/ before biopsy       | Changed treatment strategy                              | Stable disease                                        | 44                  |
| 3           | F   | 11      | Seizures        | R-T, F            | Diffuse astrocytoma    | II        | No                              | Moderately increased uptake         | 0.7    | 1.5 | 0.8 | Baseline evaluation/ after biopsy        | None                                                    | Partial response                                      | 8                   |
| 4           | M   | 10      | Headache        | R-T, F            | Diffuse astrocytoma    | II        | No                              | No uptake                           | 0.5    | 1   | 0.6 | Baseline evaluation/ before biopsy       | Changed treatment strategy                              | Stable disease                                        | 27                  |
| 5           | M   | 14      | Unspecific      | R and L P         | Diffuse astrocytoma    | II        | No                              | No uptake                           | 0.4    | 1   | 0.5 | Baseline evaluation/ before biopsy       | Changed treatment strategy                              | Stable disease                                        | 8                   |
| 6           | F   | 6       | Seizures        | L-F, P            | Anaplastic astrocytoma | III       | No                              | Markedly increased uptake           | 2.1    | 2.2 | 1.2 | Suspected disease progression on MR      | Differentiated between PD and treatment related changes | PD and DOD                                            | 5                   |

|     |   |    |          |                   |                                              |     |     |                             |     |     |     |                                              |                                                         |                |    |
|-----|---|----|----------|-------------------|----------------------------------------------|-----|-----|-----------------------------|-----|-----|-----|----------------------------------------------|---------------------------------------------------------|----------------|----|
|     |   |    |          |                   |                                              |     |     |                             |     |     |     | imaging                                      |                                                         |                |    |
| 7   | M | 14 | Headache | L-T, P            | Anaplastic astrocytoma                       | III | No  | Markedly increased uptake   | 1.3 | 2   | 1.1 | Baseline evaluation/ before biopsy           | Guided biopsy site                                      | PD             | 12 |
| 8   | F | 17 | Seizures | L-T, F            | Glioblastoma multiforme                      | IV  | No  | Markedly increased uptake   | 1.8 | 2.3 | 1.2 | Baseline evaluation/ after biopsy            | None                                                    | Stable disease | 20 |
| 9   | M | 13 | Seizures | R-T, F, P         | Gliomatosis cerebri (diffuse astrocytoma)    | II  | No  | Moderately increased uptake | 0.9 | 1.3 | 0.8 | Baseline evaluation/ after biopsy            | None                                                    | Stable disease | 32 |
| 10* | M | 8  | Seizures | L-T, F, P, BG     | Gliomatosis cerebri (diffuse astrocytoma)    | II  | No  | Markedly increased uptake   | 2.7 | 2.3 | 1.2 | Baseline evaluation/ after biopsy            | Changed treatment strategy                              | PD             | 25 |
|     |   |    |          |                   |                                              |     |     |                             |     |     |     | Follow-up on prior <sup>18</sup> F-DOPA scan | Differentiated between PD and treatment-related changes |                |    |
| 11  | F | 6  | Seizures | R-T, F, P, Th     | Gliomatosis cerebri (anaplastic astrocytoma) | III | No  | Markedly increased uptake   | 2.1 | 1.7 | 1.2 | Baseline evaluation/ before biopsy           | Guided biopsy site                                      | PD and DOD     | 9  |
| 12  | F | 17 | Headache | L-F, P, Th, R-Th  | Gliomatosis cerebri (anaplastic astrocytoma) | III | No  | Markedly increased uptake   | 2.3 | 3.4 | 1.5 | Suspected disease progression on MR imaging  | Differentiated between PD and treatment related changes | PD             | 8  |
| 13  | M | 8  | Seizures | L-F, P, O, BG, Th | Gliomatosis cerebri                          | IV  | Yes | Markedly increased          | 1.8 | 2.3 | 1.4 | Baseline evaluation/                         | None                                                    | PD             | 4  |

|  |  |  |  |  |                              |  |  |        |  |  |  |              |  |  |  |
|--|--|--|--|--|------------------------------|--|--|--------|--|--|--|--------------|--|--|--|
|  |  |  |  |  | (glioblastoma<br>multiforme) |  |  | uptake |  |  |  | after biopsy |  |  |  |
|--|--|--|--|--|------------------------------|--|--|--------|--|--|--|--------------|--|--|--|

\*Two <sup>18</sup>F-DOPA PET/MR imaging scans were obtained.

T = temporal; F = frontal; P = parietal; BG = basal ganglia; Th = thalamus; DOD = died of disease; O = occipital.
